# Supplementary material for: Patients with Concurrent Tuberculosis and Diabetes Have a Pro-Atherogenic Plasma Lipid Profile
Source: PubMed Central journal article supplement — eBioMedicine. 2018 May 17;32:192–200. doi: 10.1016/j.ebiom.2018.05.011 (PMC6020709; doi:10.1016/j.ebiom.2018.05.011), 2018-05-17
Supplement: mmc3.pdf [file mmc3.pdf]

**Patients with concurrent tuberculosis and diabetes have a pro-atherogenic plasma lipid profile**

**Frank Vrieling, Katharina Ronacher, Léanie Kleynhans, Erik van den Akker, Gerhard Walzl, Tom H. M. Ottenhoff and Simone A. Joosten**

**Supplementary Materials**

Figure S1

a

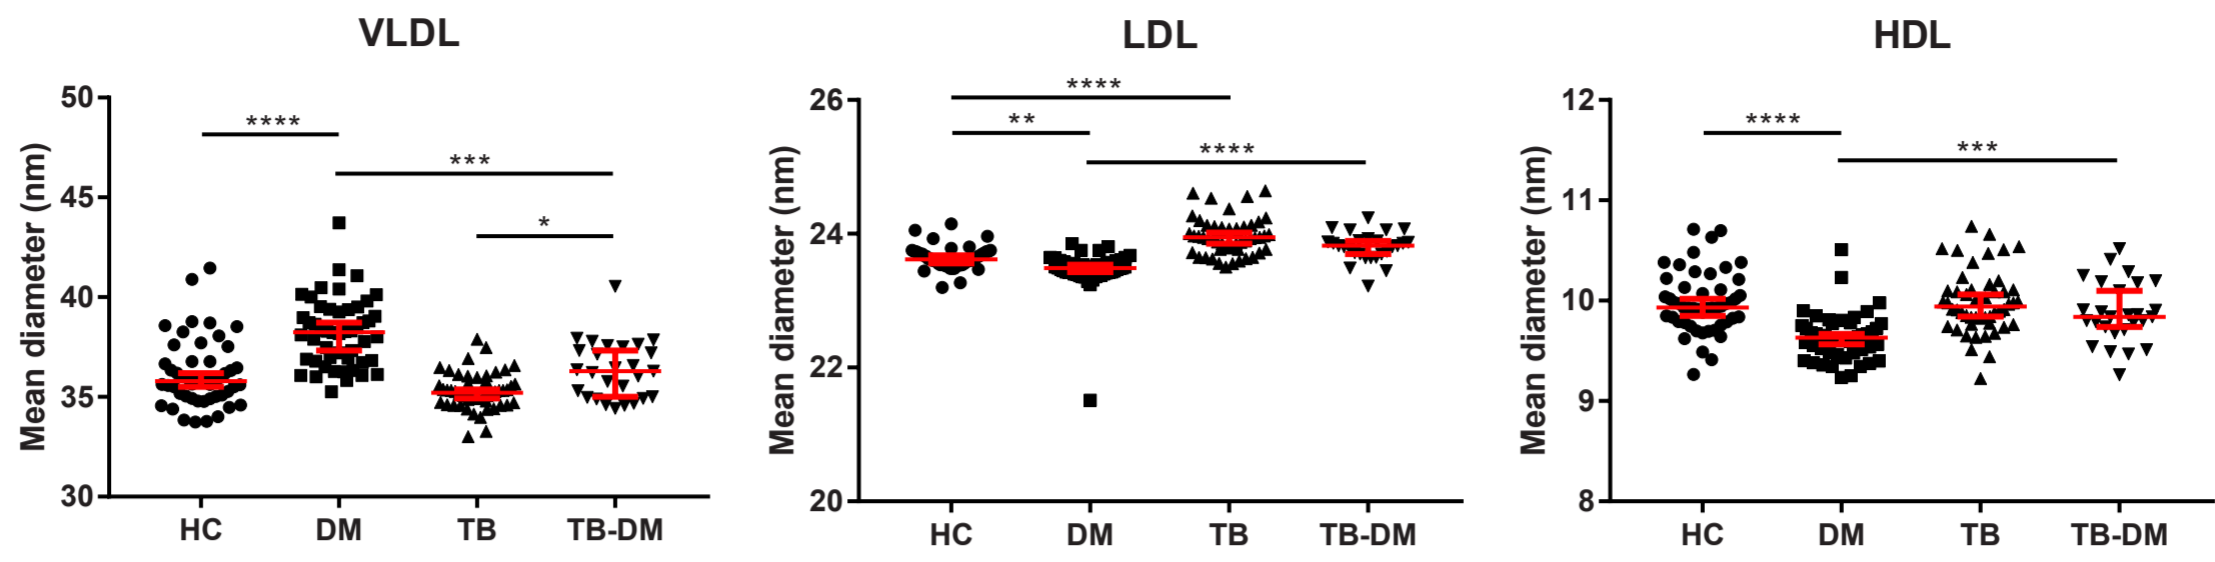

b

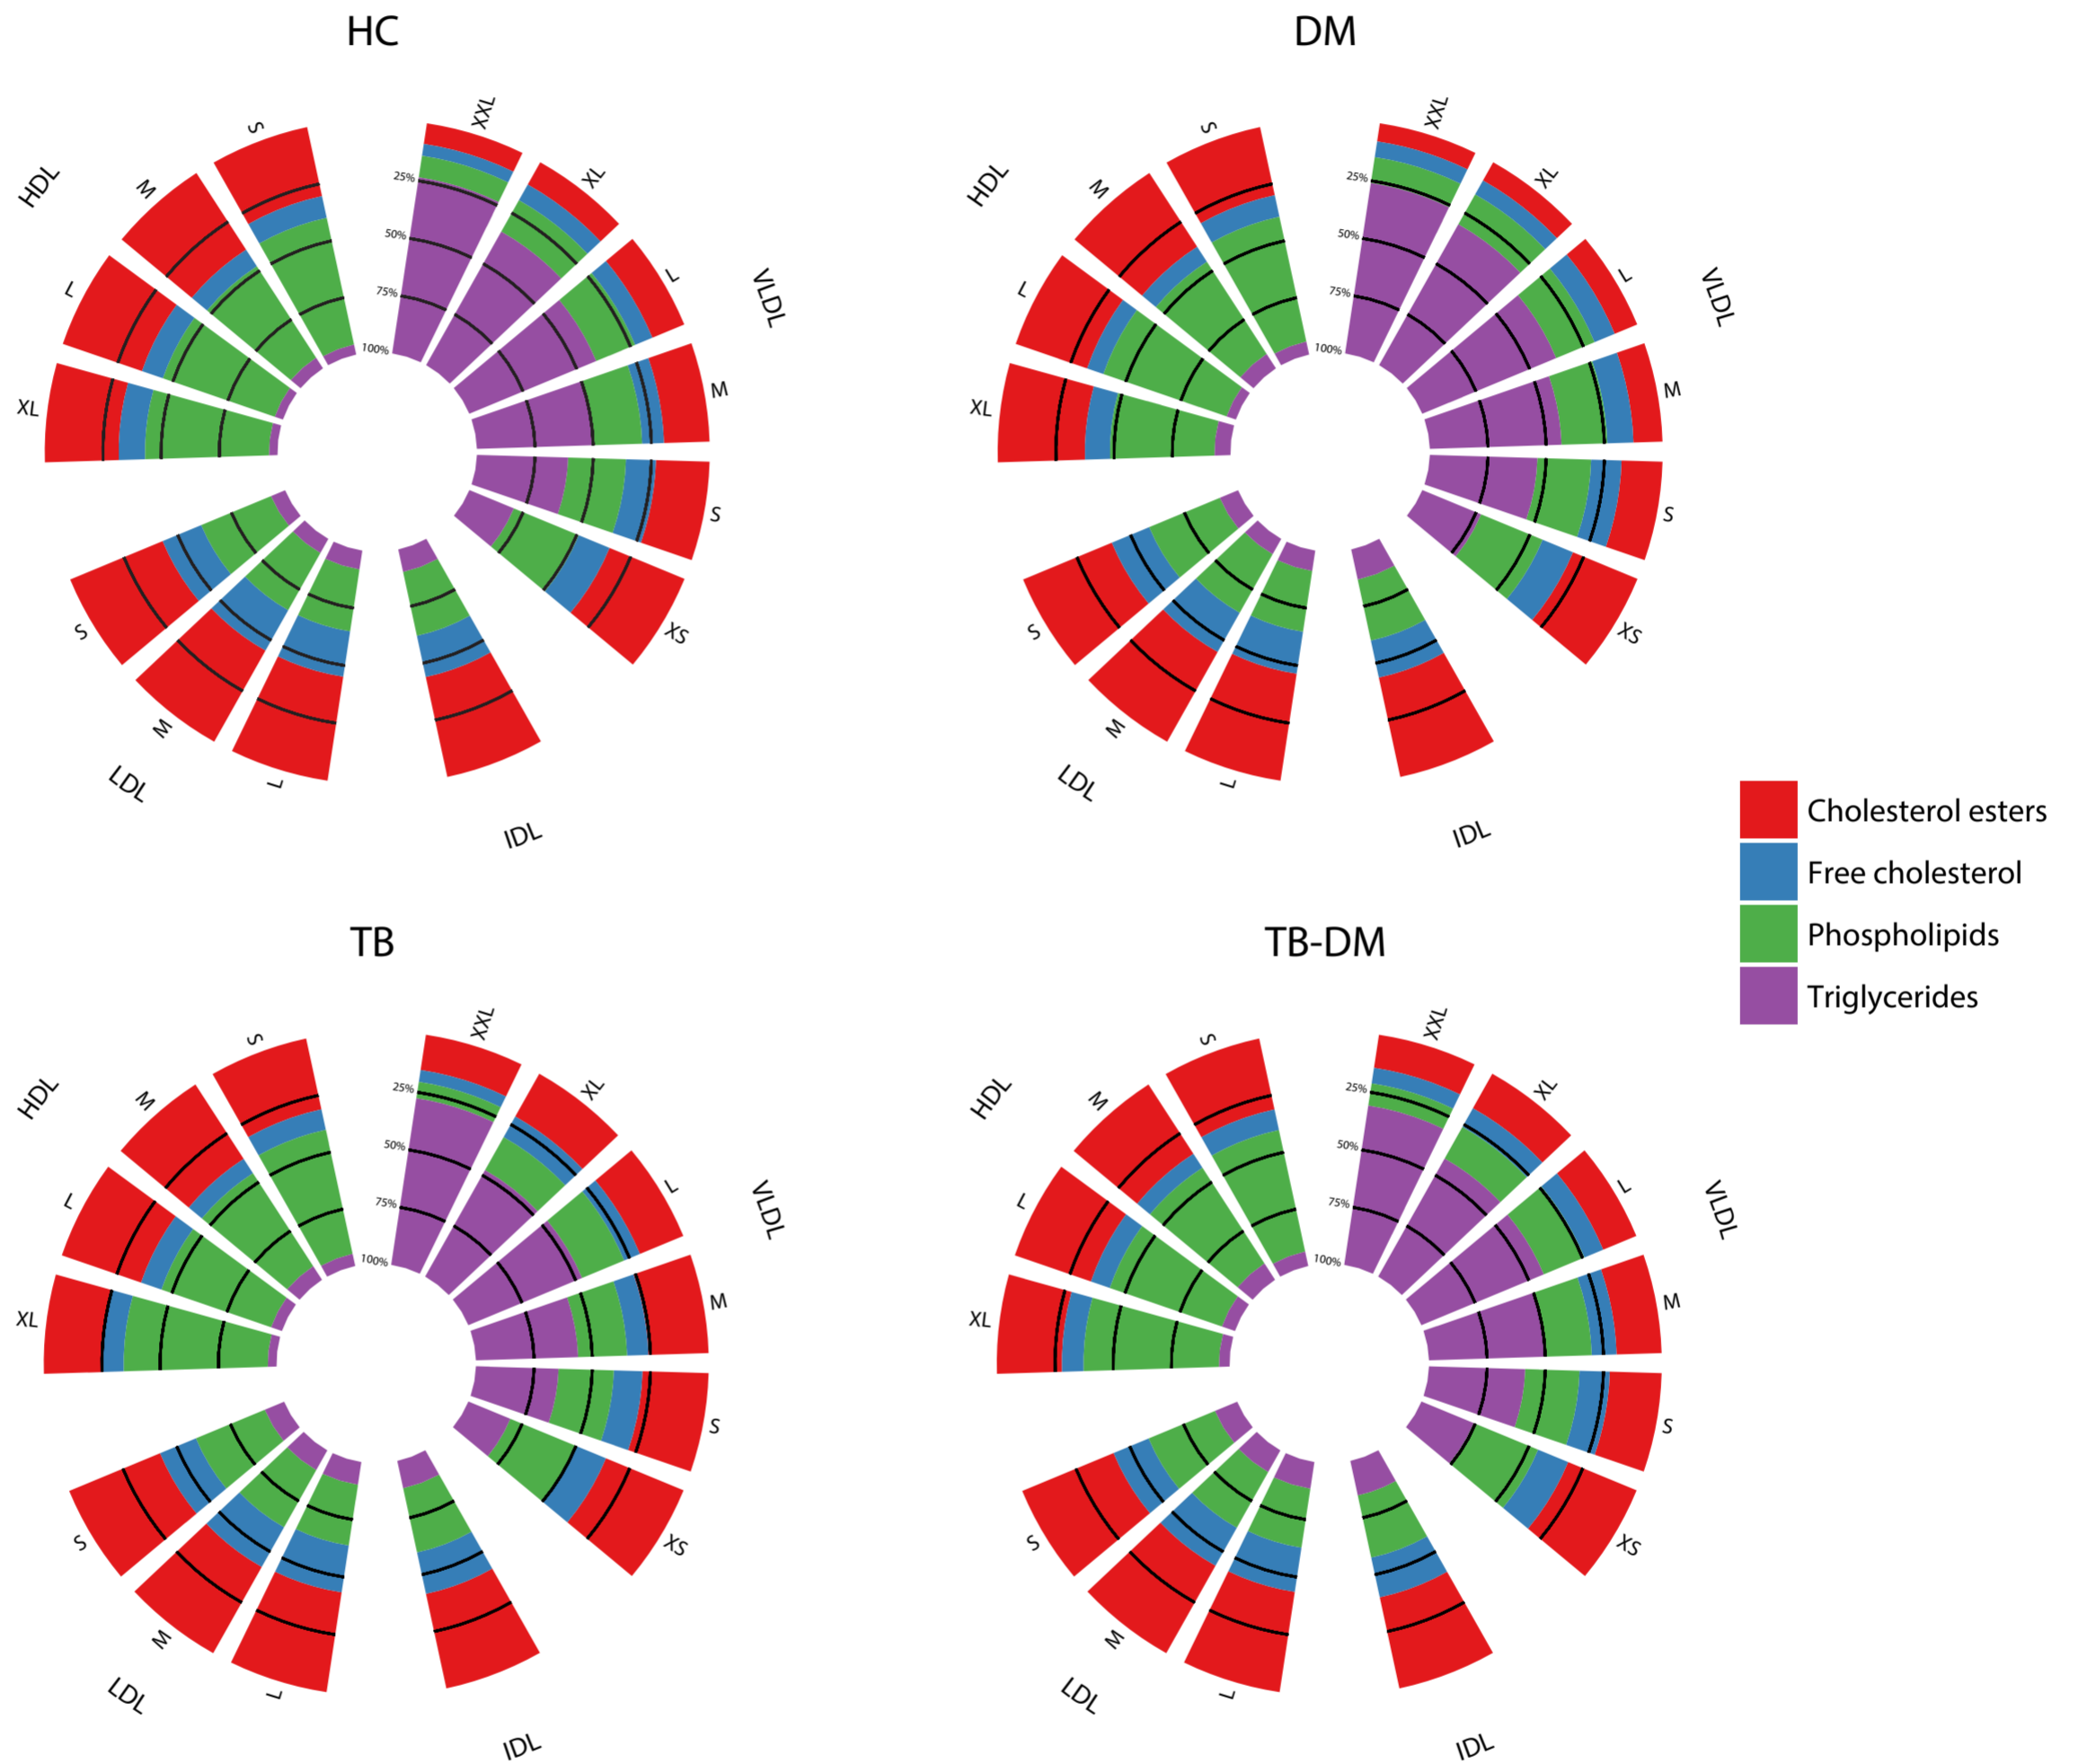

c

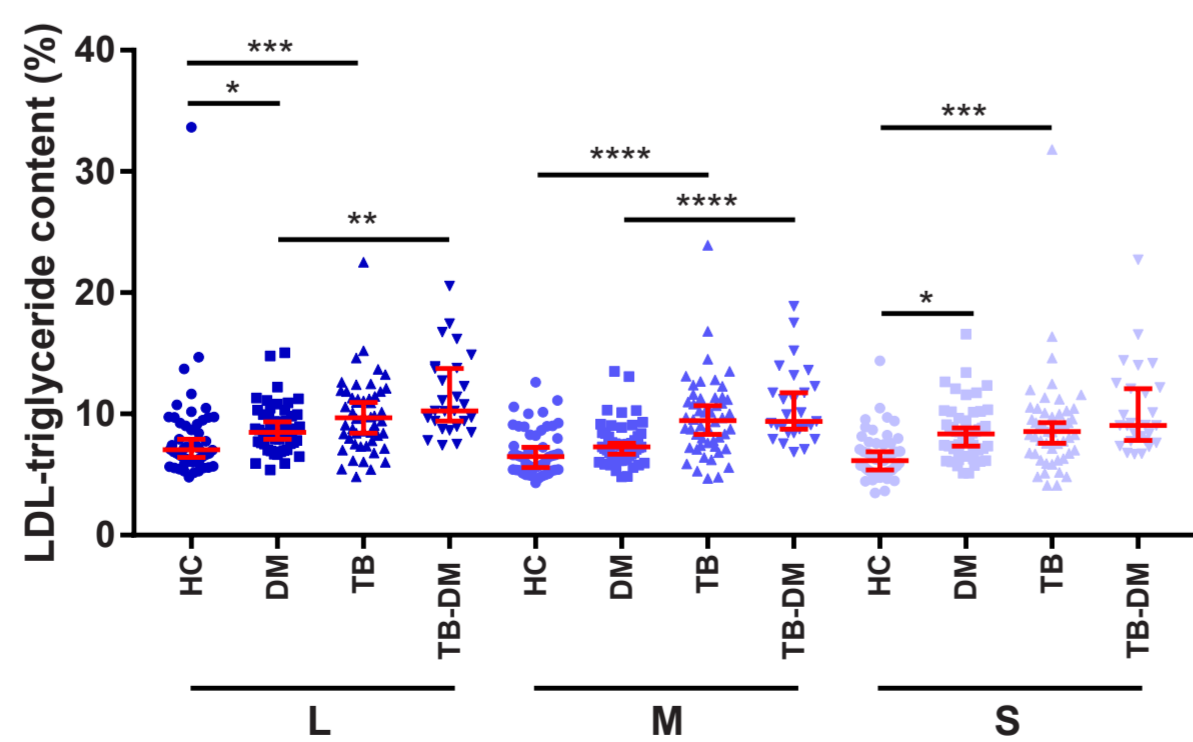

# Figure S2

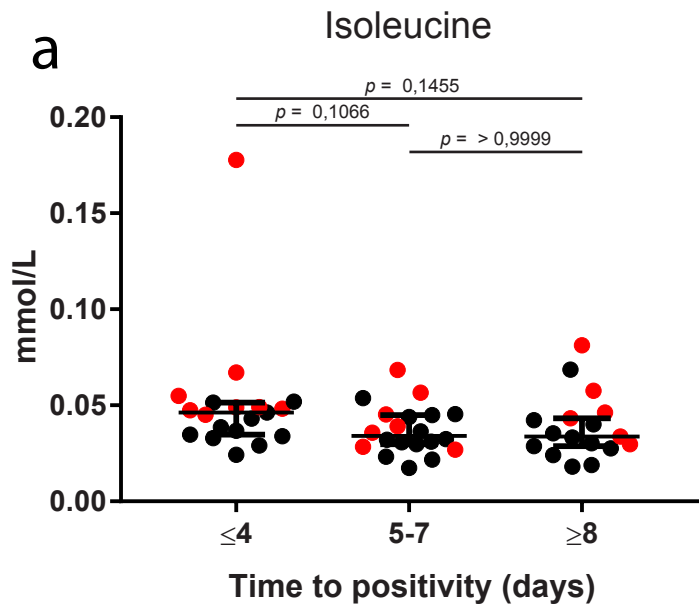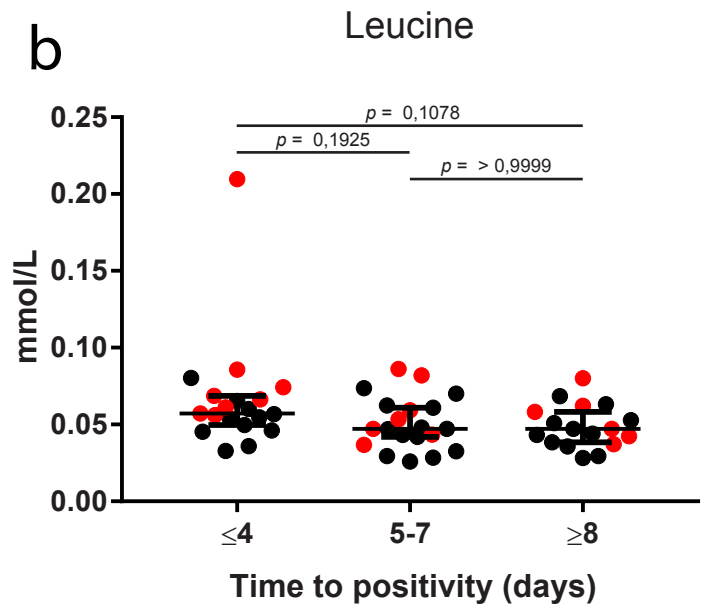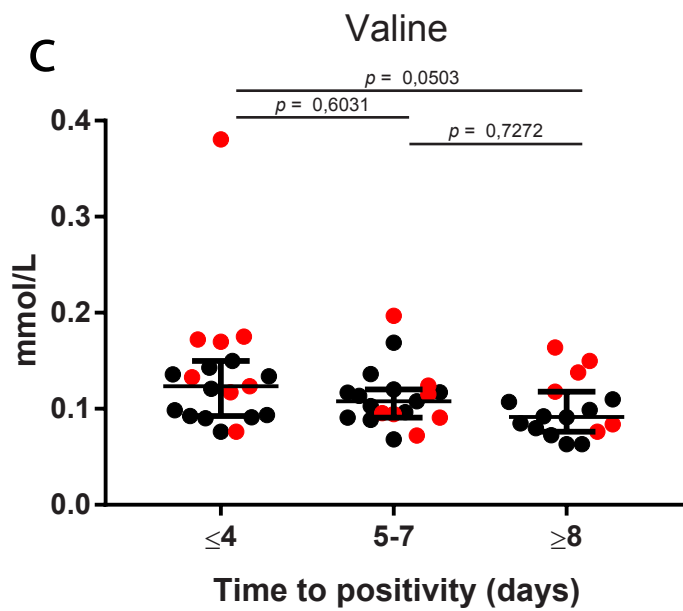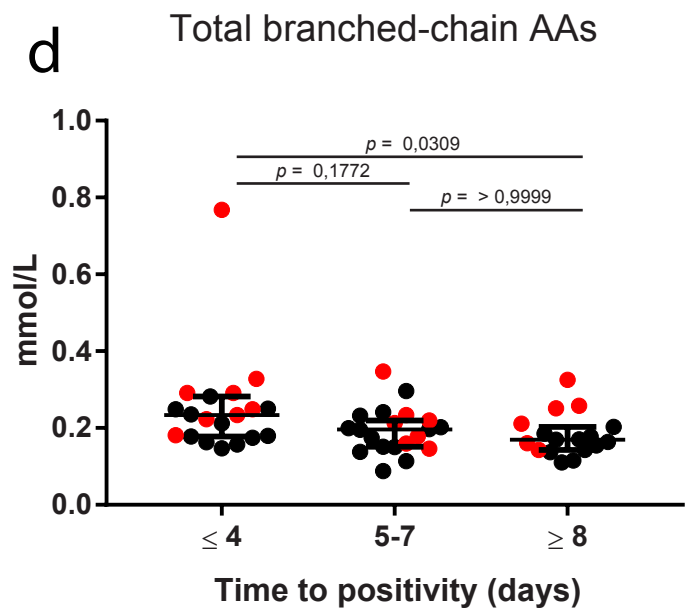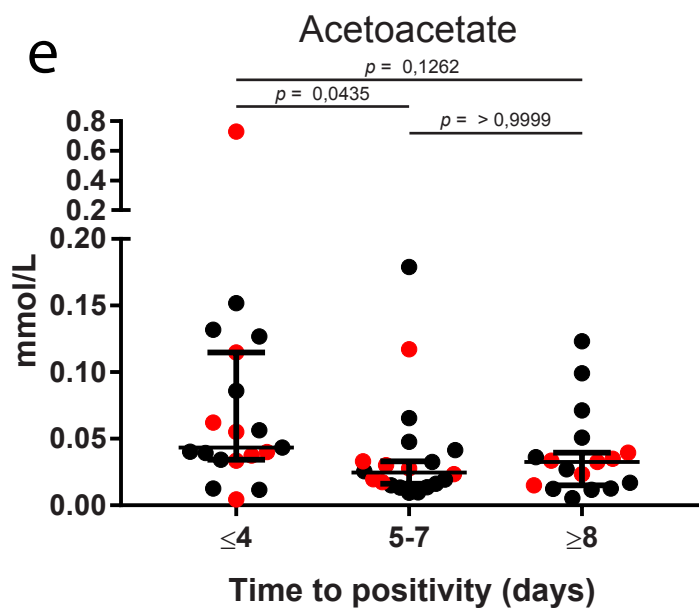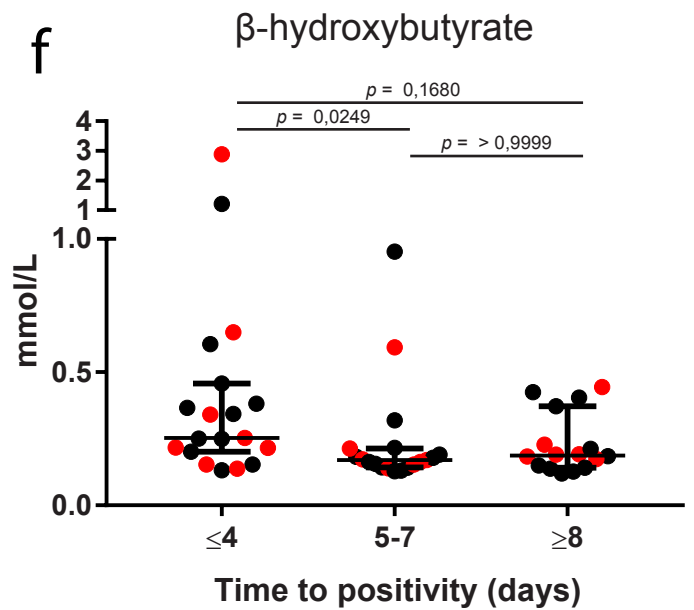

**Figure S1. Lipoprotein diameter and lipid compositions.** (a) Mean diameters (nm) of VLDL, LDL and HDL particles. Data are displayed as scatter plots with median and 95% CI, with each dot representing one individual. HC (n=50) and TB-DM (n=27) were compared to TB-only (n=50) and DM-only (n=50) by Kruskal-Wallis test with post-hoc Dunn's test. \*  $p = 0.05$ , \*\*  $p = 0.01$ , \*\*\*  $p = 0.001$ , \*\*\*\*  $p = 0.0001$ . (b) Lipid compositions of 14 lipoprotein subclasses. Each bar represents the total composition (100%) of a specific particle. Cholesterol ester (red), free cholesterol (blue), phospholipid (green) and triglyceride (purple) content are shown. (c) Relative triglyceride content of different LDL particles (%). Data are displayed as scatter plots with median and 95% CI, with each dot representing one individual. HC (n=50) and TB-DM (n=27) were compared to TB-only (n=50) and DM-only (n=50) by Kruskal-Wallis test with post-hoc Dunn's test. \*  $p = 0.05$ , \*\*  $p = 0.01$ . \*\*\*  $p = 0.001$ , \*\*\*\*  $p = 0.0001$ .

**Figure S2. Biomarker correlation with TTP.** TB and TB-DM patients were grouped according to TTP:  $\leq 4$  days (n=19), 5-7 days (n=20) and  $\geq 8$  days (n=17). Absolute concentrations of isoleucine (a), leucine (b), valine (c), total branched-chain amino acids (d), acetoacetate (e) and  $\beta$ -hydroxybutyrate (f) are shown. Data are displayed as scatter plots with median and 95% CI, with each dot representing one individual. Black and red dots represent TB and TB-DM patients, respectively. Groups were compared by Kruskal-Wallis test with post-hoc Dunn's test.
